# Supplementary material for: Revisiting typing systems for group B Streptococcus prophages: an application in prophage detection and classification in group B Streptococcus isolates from Argentina
Source: PubMed Central journal article supplement (PMC11485964; doi:10.1099/mgen.0.001297), 2024-10-17
Supplement: mgen-10-01297-s001.pdf [file mgen-10-01297-s001.pdf]

# Detailed Materials and Methods

## M3. Prophage detection and typing.

In the first instance, prophage sequences were detected and preliminarily classified using the previous screening methods for prophage groups [1] and integrase type [2], followed by a manual curation as follows:

1- Prophage groups A-F were established using an *in silico* PCR with ipress (part of the exonerate package v2.4.0), [3], based on the 12 primer pairs designed by van der Meer-Marquet et al. [1]; a strain was considered to be potentially carrying a prophage when a positive result (sequence of the expected size amplified) was obtained with at least one primer pair.

2- The integrase type was defined based on the method by Crestani et al [2]: a blastx (Blast v2.9.0+) [4] search was executed with genome assemblies as query, against the GBS prophage integrase database; an integrase type (*GBSInt*) for the potential prophage was assigned when there was at least 90% of sequence identity over 95% of the sequence length.

3- Results of the two screening methods were combined corroborating that the detected genes were located on the same contig. The putative prophages were classified into prophage types according to prophage group and integrase type.

4- To verify the presence of the screened prophages, the navigator function of Artemis v17.0.1 [5] was used to manually search for the genes and sequences of interest within the assembled genomes. The prophages with an assigned integrase type were located directly by searching for the *att* sequences corresponding to the integrase type, while those without an assigned integrase type were located by searching for the phage group-determining genes and the environment of these genes was manually explored to delimit the beginning and end of the prophages.

All prophages were annotated with RASTtk v2.0 in the RAST server [6–8], customising the default pipeline to prioritise the annotation of phage proteins.

If a prophage sequence was fragmented across two or more contigs, the prophage was reconstructed as follows:

1- A megablast search was performed to compare each fragmented prophage against non-fragmented prophage sequences. The prophage with the highest identity and coverage (>99% and >80%, respectively) was used as reference for mapping the raw reads of genomes harbouring fragmented prophages.

2- Smalt v0.7.6 [9] was used for mapping the reads against the reference genomes and the analysis and organisation of the reads was performed with SAMtools v1.12 [10].

3- The mapped reads were extracted and used for *de novo* assembly with SPAdes v3.13.1 [11].

4- The newly assembled prophages were annotated with RASTtk and compared with the original contigs to confirm consistent coding sequence content.

A phylogenetic tree was constructed to analyse the relationships between all prophages detected, as follows:

1- The extracted prophage sequences were aligned with MAFFT v7.505 [12], using CIPRES Science Gateway [13], with default parameters.

2- A maximum-likelihood (ML) phylogenetic tree was reconstructed with IQTree v1.6.12 [14], with ModelFinder [15] to determine the best-fit model with 1000 SH-aLRT [16] and 1000 ultrafast-bootstrap [17] replicates.

Prophages that could not be assigned to a prophage group by the *in silico* PCR during the initial screening stage were classified as belonging to the same prophage group as other classified prophages in their phylogenetic cluster.

#### **M4. Improvement of the prophage typing system**

To improve the integrated screening system and to avoid false positive and false negative results with the *in silico* PCR, a new prophage group detection method is here proposed. The method was developed as follows:

1- A database was built with the genes amplified by primers developed by van der Meer-Marquet [1].

a) A blastn search was performed in the prophages to verify that the same results were obtained as by the *in silico* PCR.

b) The 22 prophages detected by van der Mee-Marquet et al. [1] were included as positive control.

2- The database was curated as follows (Table S1 in S2 File ):

a) New genes were selected from the control and Argentinean prophage sequences and added to the database, as representatives for non-typable prophage groups.

b) Genes responsible for false positive results were replaced.

3- A new blastn search was performed against the enriched database, to test the methodology on the 22 prophages detected by van der Mee-Marquet and on those obtained from Argentinean GBS genomes. A positive result was considered when at least one of the genes for the prophage group was detected with a minimum of 75% of identity and coverage.

4- To ensure the new method was effective, the blastn search was repeated using as query the whole genomes of:

a) the 365 GBS from Argentina and

b) a dataset of 250 GBS isolated from humans and animals in 34 countries on 5 continents, of a wide variety of clonal complexes and temporal origins, downloaded from NCBI (<https://www.ncbi.nlm.nih.gov/>, May 2023) (Table S2 in S2 File).

5- The results were integrated with blastx results for integrase type searches [2].

When prophages with integrase subtypes (n=2) not described by Crestani et al. were found, the criteria described by the authors were followed for their classification: integrase genes with the same insertion site but with aminoacid sequence identity below 90% were classified as the same type but different subtype [2].

## **M5. Prophage characterization.**

Several steps were followed for the characterization of all GBS prophages found:

1- Prophage sequences were searched for genetic determinants of virulence and antimicrobial resistance with:

a) ABRicate v0.9.9 [18], using VFDB (version 2023-06-27) [19] and ResFinder (version 2023-06-27) [20] databases, respectively, and

b) AMRFinderPlus v3.11.4 (database version 2023-04-17.1) [21].

2- The SEED Viewer v2.0 [7] was used to browse the RASTtk annotations to search for prophage genes potentially beneficial for the host bacteria.

3- Genes coding for integrase, helicase, terminase large subunit, major capsid protein and lysin, were used for the phylogenetic analysis of each prophage module, as described in section M3.

One phage of each prophage type (n=29, see results section) was selected for further characterization:

1- The morphology of the prophages was determined by the recognition of their head-neck-tail modules with VIRFAM [22].

2- CDD [23], CDART [24] and InterPro [25] were used to identify the function of the prophage genes annotated as encoding hypothetical or phage proteins and also to analyse the catalytic domain of the putative integrases and lysins present.

3- To analyse the genetic differences between prophages of the same prophage group but different integrase type and *vice versa*, a comparative analysis of the prophage sequences was performed with clinker v0.027 [26].

To provide a broader context to the prophages from Argentinian GBS, 70 GBS prophages were accessed from NCBI (May 2023) alongside 369 prophages of other 43 streptococcal species identified by Rezaei Javan et al. [27] for a total of 764 prophages (Table S3 in S2 File). All prophages were aligned with MAFFT, and a ML phylogenetic tree was reconstructed using IQTree, as described in section M3. Additionally, the prophage type of GBS prophages from NCBI was determined as described in M3 in this file.

## Supplementary References

1. van der Mee-Marquet N, Diene SM, Barbera L, Courtier-Martinez L, Lafont L, Ouachée A, et al. Analysis of the prophages carried by human infecting isolates provides new insight into the evolution of Group B Streptococcus species. *Clin Microbiol Infect.* 2018;24: 514–521. doi:10.1016/j.cmi.2017.08.024
2. Crestani C, Forde TL, Zadoks RN. Development and Application of a Prophage Integrase Typing Scheme for Group B Streptococcus. *Front Microbiol.* 2020;11: 1993. doi:10.3389/fmicb.2020.01993
3. Slater G, Birney E. Automated generation of heuristics for biological sequence comparison. *BMC Bioinformatics.* 2005;6: 31. doi:10.1186/1471-2105-6-31
4. Camacho C, Coulouris G, Avagyan V, Ma N, Papadopoulos J, Bealer K, et al. BLAST+: architecture and applications. *BMC Bioinformatics.* 2009;10: 421. doi:10.1186/1471-2105-10-421
5. Carver T, Harris SR, Berriman M, Parkhill J, McQuillan JA. Artemis: an integrated platform for visualization and analysis of high-throughput sequence-based experimental data. *Bioinformatics.* 2012;28: 464–469. doi:10.1093/bioinformatics/btr703
6. Aziz RK, Bartels D, Best AA, DeJongh M, Disz T, Edwards RA, et al. The RAST Server: Rapid Annotations using Subsystems Technology. *BMC Genomics.* 2008;9: 75. doi:10.1186/1471-2164-9-75
7. Overbeek R, Olson R, Pusch GD, Olsen GJ, Davis JJ, Disz T, et al. The SEED and the Rapid Annotation of microbial genomes using Subsystems Technology (RAST). *Nucleic Acids Res.* 2014;42: D206–D214. doi:10.1093/nar/gkt1226
8. Brettin T, Davis JJ, Disz T, Edwards RA, Gerdes S, Olsen GJ, et al. RASTtk: A modular and extensible implementation of the RAST algorithm for building custom annotation pipelines and annotating batches of genomes. *Sci Rep.* 2015;5: 8365. doi:10.1038/srep08365
9. Ponstingl H. SMALT. Wellcome Trust Sanger Institute, Cambridge, UK; 2010. Available: <https://www.sanger.ac.uk/tool/smalt/>
10. Danecek P, Bonfield JK, Liddle J, Marshall J, Ohan V, Pollard MO, et al. Twelve years of SAMtools and BCFtools. *GigaScience.* 2021;10: giab008. doi:10.1093/gigascience/giab008
11. Bankevich A, Nurk S, Antipov D, Gurevich AA, Dvorkin M, Kulikov AS, et al. SPAdes: A New Genome Assembly Algorithm and Its Applications to Single-Cell Sequencing. *J Comput Biol.* 2012;19: 455–477. doi:10.1089/cmb.2012.0021
12. Katoh K, Standley DM. MAFFT Multiple Sequence Alignment Software Version 7: Improvements in Performance and Usability. *Mol Biol Evol.* 2013;30: 772–780.

doi:10.1093/molbev/mst010

13. Miller MA, Pfeiffer W, Schwartz T. Creating the CIPRES Science Gateway for inference of large phylogenetic trees. Proceedings of the Gateway Computing Environments Workshop (GCE). New Orleans, LA; 2010. p. pp 1-8.
14. Minh BQ, Schmidt HA, Chernomor O, Schrempf D, Woodhams MD, von Haeseler A, et al. IQ-TREE 2: New Models and Efficient Methods for Phylogenetic Inference in the Genomic Era. Teeling E, editor. *Mol Biol Evol.* 2020;37: 1530–1534. doi:10.1093/molbev/msaa015
15. Kalyaanamoorthy S, Minh BQ, Wong TKF, Von Haeseler A, Jermin LS. ModelFinder: fast model selection for accurate phylogenetic estimates. *Nat Methods.* 2017;14: 587–589. doi:10.1038/nmeth.4285
16. Guindon S, Dufayard J-F, Lefort V, Anisimova M, Hordijk W, Gascuel O. New Algorithms and Methods to Estimate Maximum-Likelihood Phylogenies: Assessing the Performance of PhyML 3.0. *Syst Biol.* 2010;59: 307–321. doi:10.1093/sysbio/syq010
17. Minh BQ, Nguyen MAT, von Haeseler A. Ultrafast Approximation for Phylogenetic Bootstrap. *Mol Biol Evol.* 2013;30: 1188–1195. doi:10.1093/molbev/mst024
18. Seemann T. Abriicate, Github <https://github.com/tseemann/abriicate>. 2020.
19. Chen L, Zheng D, Liu B, Yang J, Jin Q. VFDB 2016: hierarchical and refined dataset for big data analysis—10 years on. *Nucleic Acids Res.* 2016;44: D694–D697. doi:10.1093/nar/gkv1239
20. Zankari E, Hasman H, Cosentino S, Vestergaard M, Rasmussen S, Lund O, et al. Identification of acquired antimicrobial resistance genes. *J Antimicrob Chemother.* 2012;67: 2640–2644. doi:10.1093/jac/dks261
21. Feldgarden M, Brover V, Gonzalez-Escalona N, Frye JG, Haendiges J, Haft DH, et al. AMRFinderPlus and the Reference Gene Catalog facilitate examination of the genomic links among antimicrobial resistance, stress response, and virulence. *Sci Rep.* 2021;11: 12728. doi:10.1038/s41598-021-91456-0
22. Lopes A, Tavares P, Petit M-A, Guérois R, Zinn-Justin S. Automated classification of tailed bacteriophages according to their neck organization. *BMC Genomics.* 2014;15: 1027. doi:10.1186/1471-2164-15-1027
23. Wang J, Chitsaz F, Derbyshire MK, Gonzales NR, Gwadz M, Lu S, et al. The conserved domain database in 2023. *Nucleic Acids Res.* 2023;51: D384–D388. doi:10.1093/nar/gkac1096
24. Geer LY. CDART: Protein Homology by Domain Architecture. *Genome Res.* 2002;12: 1619–1623. doi:10.1101/gr.278202
25. Paysan-Lafosse T, Blum M, Chuguransky S, Grego T, Pinto BL, Salazar GA, et al.

- InterPro in 2022. *Nucleic Acids Res.* 2023;51: D418–D427. doi:10.1093/nar/gkac993
26. Gilchrist CLM, Chooi Y-H. clinker & clustermap.js: automatic generation of gene cluster comparison figures. Robinson P, editor. *Bioinformatics.* 2021;37: 2473–2475. doi:10.1093/bioinformatics/btab007
  27. Rezaei Javan R, Ramos-Sevillano E, Akter A, Brown J, Brueggemann AB. Prophages and satellite prophages are widespread in *Streptococcus* and may play a role in pneumococcal pathogenesis. *Nat Commun.* 2019;10: 4852. doi:10.1038/s41467-019-12825-y

## Supplementary Figures

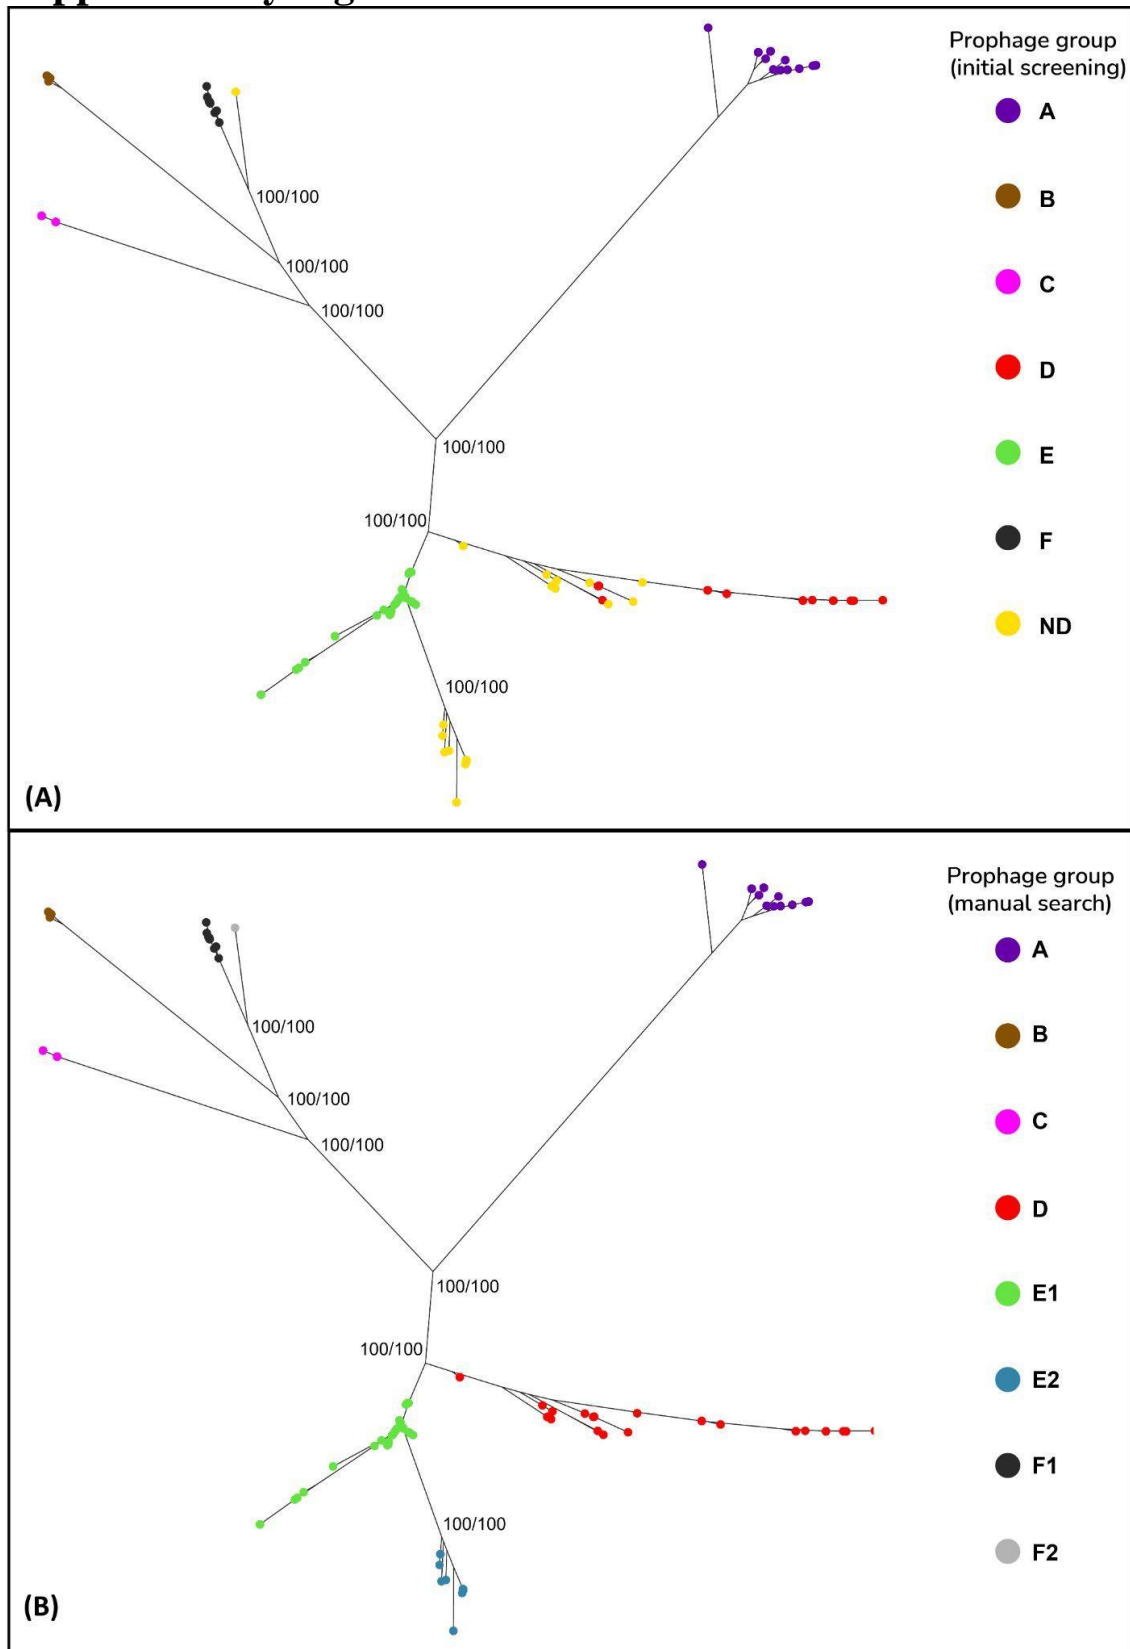

**Fig S1. Phylogeny of the 325 prophages found in 365 GBS genomes from Argentina.** Maximum likelihood phylogenetic tree with nodes coloured by prophage group. Ultrafast-bootstrap values are shown as labels in the main clusters. (A) Prophage groups determined by the original screening by *in silico* PCR; prophages classified as ND (coloured in yellow) were not detected by the PCR so their prophage group was not determined. (B) Prophage groups determined after the manual search of the prophages and their phylogenetic analysis; prophages previously classified as ND were assigned the prophage group corresponding to their cluster. <https://microreact.org/project/phylogeny-argentinean-gbs-prophages>



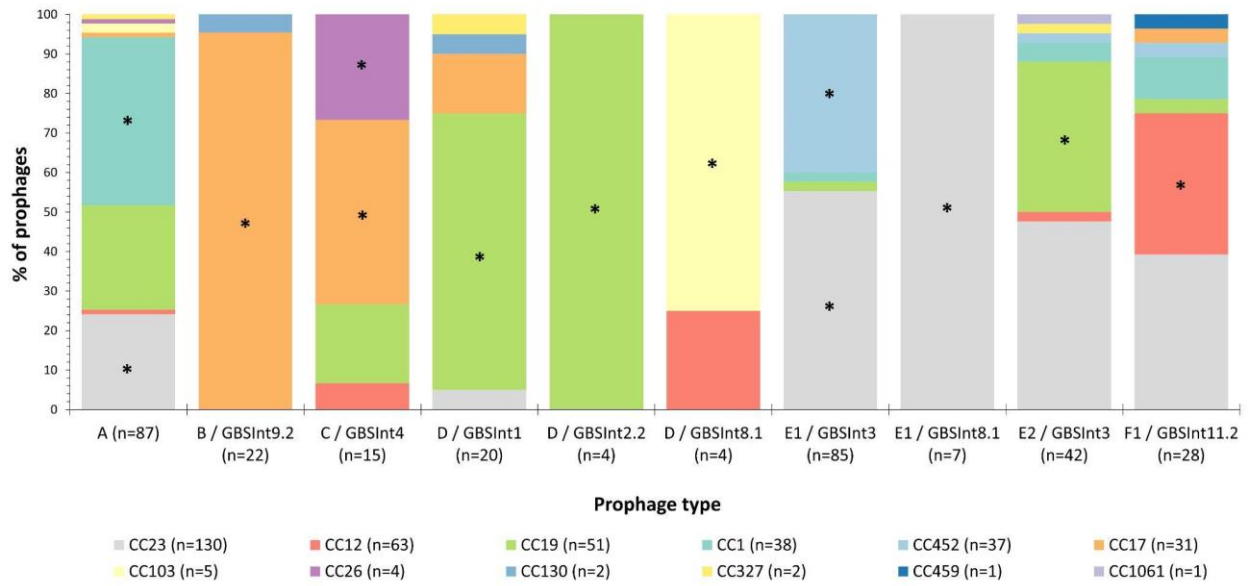

**Fig S2. Prophage distribution in GBS isolates from Argentina according to clonal complex.** Only the prophage types with  $n > 2$  are shown. Significant associations ( $p < 0.05$ ) between prophage type and CC are marked with \*.

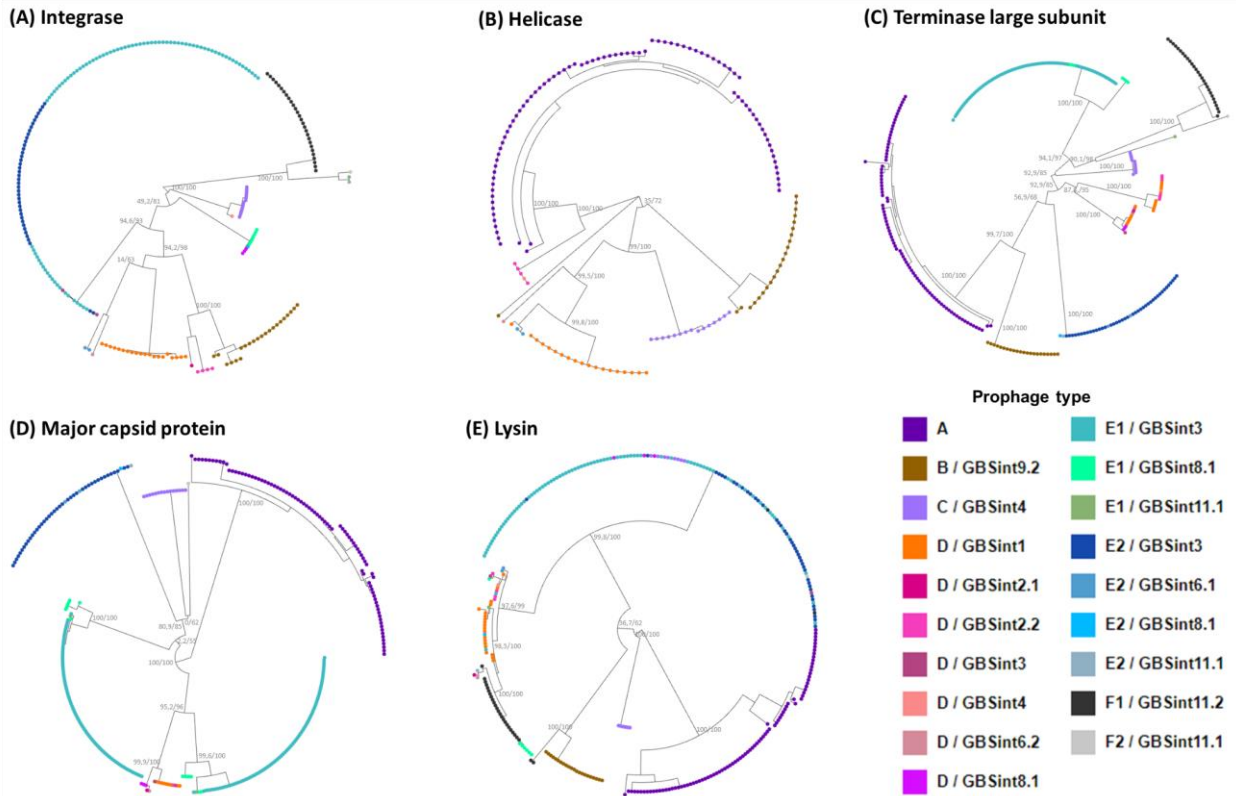

**Fig S3. Phylogeny of selected modular genes of the 325 GBS prophages from Argentina.** Maximum likelihood phylogenetic trees, midpoint rooted, based on the aligned nucleotide sequences of the genes coding for (A) integrase (lysogeny module), (B) helicase (replication module) (C) terminase large subunit (packaging module), (D) major capsid protein (morphogenesis module) and (E) lysin (host lysis module). Tree nodes are coloured by prophage type. Support values (SH-aLRT/ Ultrafast Bootstrap) are shown as labels for selected nodes. <https://microreact.org/project/phylogeny-of-modular-genes>

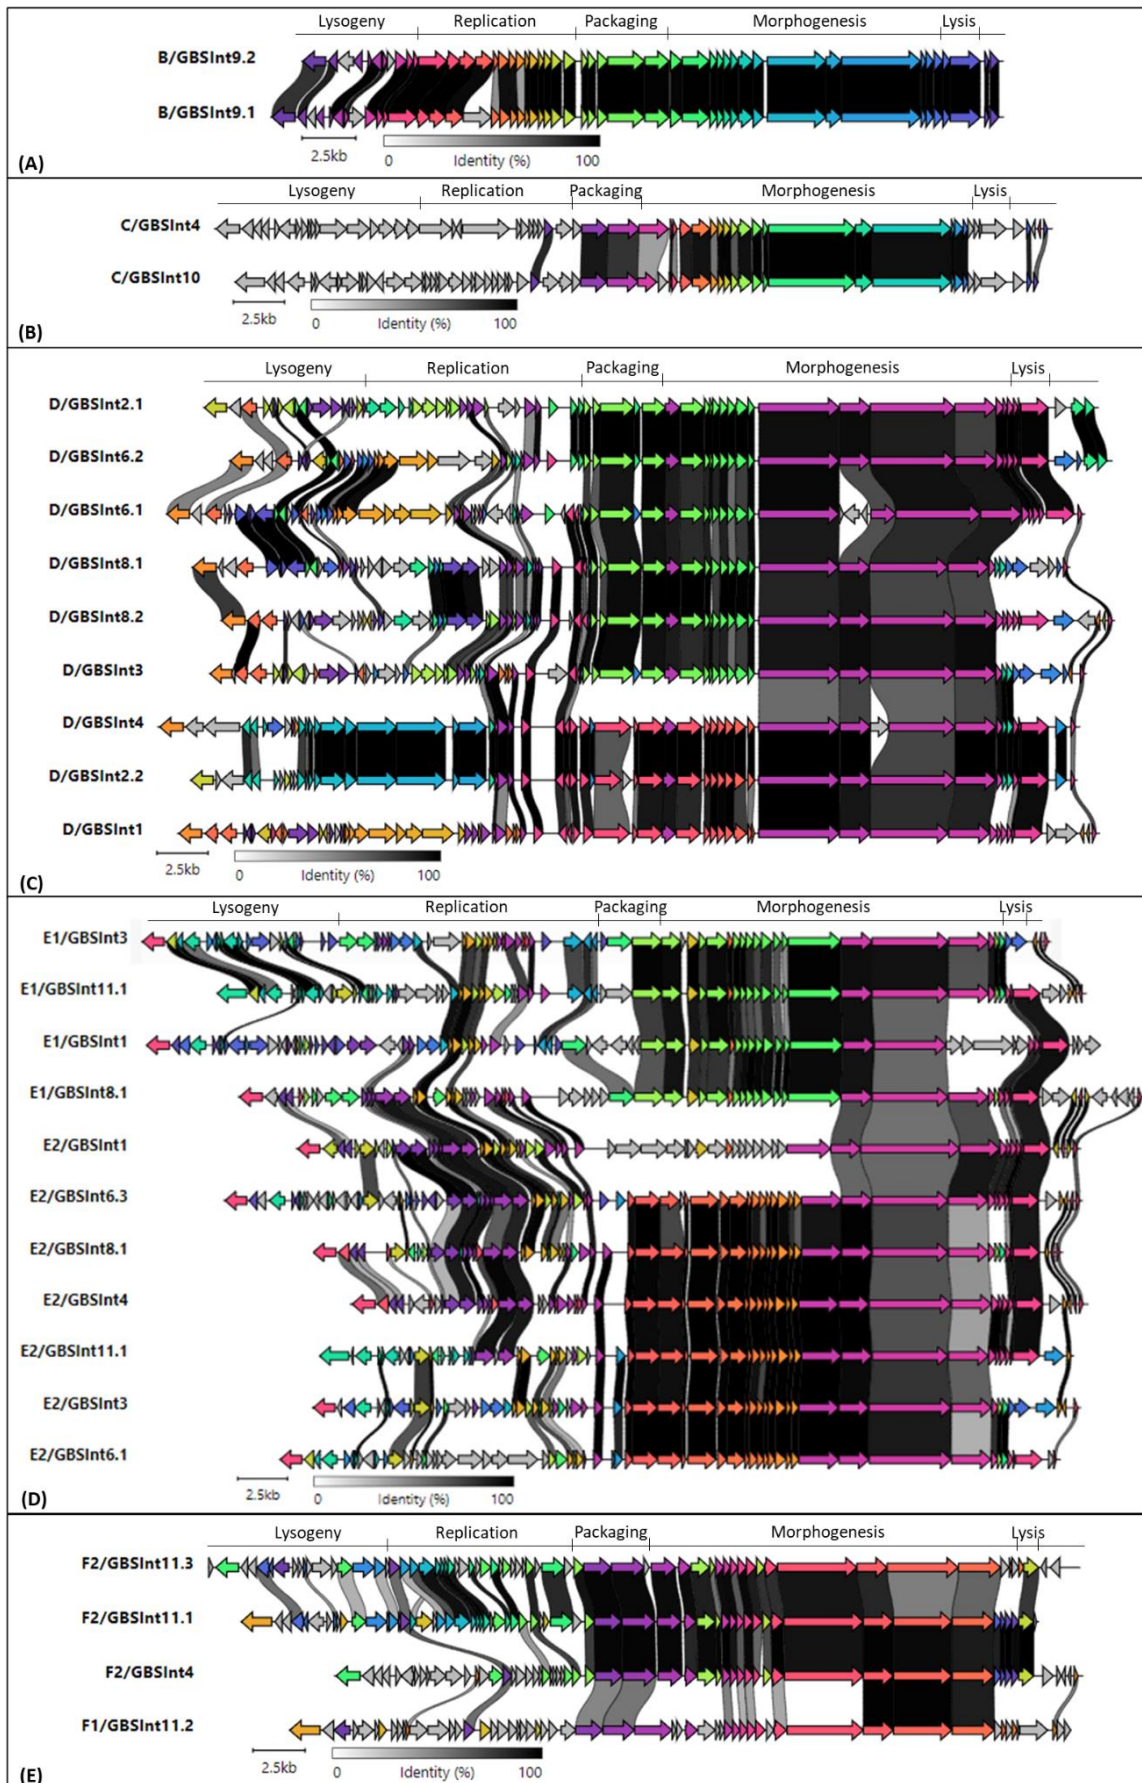

**Fig S4. Comparative analysis of phages belonging to the same prophage group but with different integrase types.** (A) Prophage group B. (B) Prophage group C. (C) Prophage group D. (D) Prophage group E. (E) Prophage group F. Genes were automatically coloured by Clinker according to their homology. Genes with more than 40% of identity are linked with gray-black strokes, as shown in the scale.

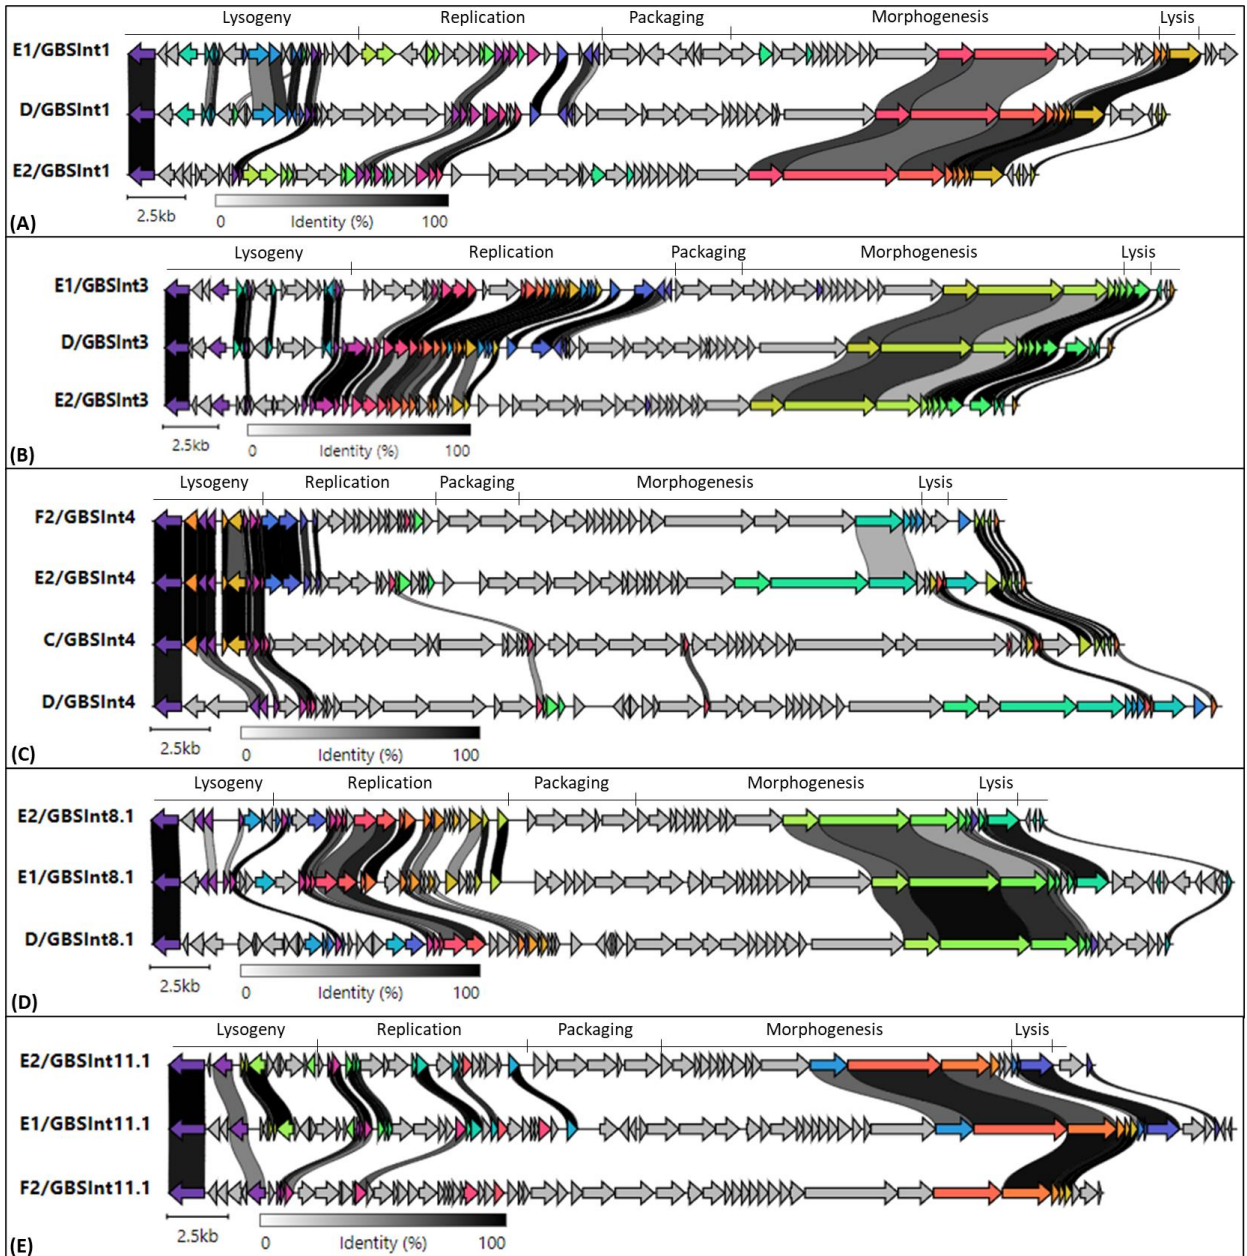

**Fig S5. Comparative analysis of phages with the same integrase type but belonging to different prophage groups.** (A) Integrase type *GBSInt1*. (B) Integrase type *GBSInt3*. (C) Integrase type *GBSInt4*. (D) Integrase type *GBSInt8*. (E) Integrase type *GBSInt11.1*. Genes were automatically coloured by Clinker according to their homology. Genes with more than 40% of identity are linked with gray-black strokes, as shown in the scale.

## Supplementary Data

**Data S1.** Prophage-group database for the screening and classification of prophages by prophage group.

### GroupA-*hhaI*

ATGACTCTAACCTTTCTTGATTTCTTTGCAGGAGTGGGTGGCCTTTCGTCGTGGGTT  
GGAATTGGCAGGTATGACCTGTCTTGGGTATTGTGAGAAGGATAAGTTTGCACGG  
AAATCCTATGAAGCAATGTACGATACAGAAGGAGAATGGTTTCATGACGACATC  
ACAAGCATTGACCCACACGACTTCCAAAAGCAGATTTATGGACTGCGGGAAGC  
CCTTGTCAAATGTGTCTATCGCAGGAAAGCGAGCCGGCCTATACGGTGAGCGA  
AGTGGACTCTTTTTTACATTTGTTGACCTCATCAAAGCCAAAAGGAAGAAGATA  
AACCCGAATGGGTTCTCCTTGAAAATGTTAAGGGACTTCTATCAAGTGGCGGGG  
GACGAGATTATCTCGACTATCTCTCTATCTTGGATGAAGCAGGGTACGACCTTGA  
ATGGCAAGTGTTCAACTCAAAGACTACGGAGTTCCCCAAAACCGAGAACGTAT  
CTACACTCTCGGACATCTTAGAAGTCGAGGTCGACGACAAGTACTACCTCTCAGC  
GGAGAAGGCGGTAGCTATCTTAAGCAACTTGTAGGTGGCATGCAAAGCTATCGA  
GTCTACGACCCAAGTGGCATTGCCACAACCCTTGTTGGTGAGGGGGGAGGACTA  
GGAGCTAAGACAGGTCTTTATCTGATTGACCAGTCTTTGACCGAGCCAAAACATA  
CTGAAGAAGCACGGTGTATAACCGCTCGTTATACGGCAGGAGCTACAAAAGAA  
CAGCAATGAACCTCTGGTGTCTTGAGGTTTCAGCCATTCTGACCCAGATAGAAT  
CACTAAACGCCAAAATGGTAGACGGCTAAAGGAACAGGATGAGCCTATGTTTAC  
TCTGACTTCTCAAGACCGTCACGGTGTCTTGAAGGCATCAAGGTCAGAAATGGG  
ACAAAGCAGGACTACCAAGTCGCAGAGGTTGGCGACTCTGTTGACCTTTCCTATC  
CAGGCTCACAGACGAGACGAGCCAGAGTAGGGAAGGGCATCGCACACAACCTCT  
CTTGTGGTGGTCAGATGGGTGCCGTGGTTTGGAAAGGGTCGAGTGGTGAAAATCA  
GACGTTTGACCCACGAGAGTGTTCAGACTCCAAGGGTTTTTCAGATGACTTGTT  
TGACAAGGCTCAGGCTGTAACTCTGATGCCAGCTCTACAAACAGGCTGGCAAT  
GGCGTGACAGTAACCGTGGTTTATGCCATTGGGAAAGCTATTTTAGAAGCCAATA  
AATCTGCAAATAATAAGCAGAAATGA

### GroupA-*clpP*

ATGCGTAAATTTTGGAAATTTACTGACGAAGGAGAAGTCCGCACCCTTCGGATTG  
AGGGACAGATTGCGGACGAGACTTGGTTTGGGGATGAAGTCACCCCGCAGCTCT  
TTAAGAATGATTTGTTAGCAGGAACAGGCGACATCACCTCTGGATAAACAGTC  
CAGGGGGTGATGTATTTGCGGCCGCTCAAATCTATAACATGCTTATGGATTATCA  
GGGCGATGTCCATGTCATCATTGATGGTCTAGCCGCCAGTGCTGCCAGTGTATC  
GCCATGGCAGGGACAACAGTTTCCATGAGTCCAGTTGCCATGATGATGATTCATA  
ACCCTTGGACGTTTTCGCAAGGTGAAGCGAAAGATATGGCCAAGGTCATTGAGA  
TGCTTGGCGAAATTAAGGAGTCCATTATCAATGCCTATGAGCTTAGAACTGGACT  
TTCCAGAACCAAGATTTCTCATCTTATGGATTTCGGAATCTTGGTTCAATGCCAAG  
AAAGCTGTGGAGCTTGGTTTTGCGGATAAAGTGCTCTTTGAGAAAGAGGAGACA  
CCTGAGCAGGATCATCAAATAGCTATACCTTTAGTAGAGTGACTGCTGCTCATG  
ATTTGGTGGTGAAACTGCAAGCGAGCCTTCAACCGCCTAAACCACAGAAAACAA  
TCCCTTTCAATCAGTTGGAAAAACGATTGAACCTATTGAAATAA

### GroupA-*holin*

ATGAAAGAATTACTGGCAACAAATAAGGTTCTCTTTTCAGCAATCGGAGGACTTA  
TCGGTTCGATTTTTGGAGAAGTGGATGGGGTCTTATATGCCCTTTTTATTTTTCTC  
ATCATTGATTATGTGACTGGAGTCTTTGCGGCAATCGTCGAGAAGAATTTATCAA  
GCGGTCTTGGTTTCAAAGGCATCTTTAAAAGATTGCCATTCTCTTTTTGGTATCC  
GTGGGACACCTCATTGATACTGAAATCATTAAAGCAGGGTGGAGCGATTTCGCACC  
ATGGTTATTTTCTTTTACTTGAGCAATGAAGGTTTGGAGTATTTTGGAAAATGCGGT

GCGGATTGGCTTGCCTATCCCTGAGAACTACGAGCCATCTTAAAACAATTCAAC  
GAAAAAGAAGGAGACTGA

**GroupA-lysin**

ATGACTTTTTTATCGAAGATTAAGACGGTTGTTTAGCGTCTTGGGAGCACGGTA  
TTCTGCCTTCCGTGTCAGCAGCACAAGCTATCTTAGAGAGTGGTTGGGGAGAGTC  
TTTGTAGCACAATACCCTATTCATAATCTCTATGGAATCAAAGCTAGTTCTGATT  
GGAAGGGAAAACGTGTTGACCTTCCAACCTCAAGAATTCATTGATGGGAAATTCG  
TCACGGTTGCCGCAACGTTTAGAAAGTATGACTCATGGGAGGAATCCATTAAAG  
ACCATGCCTTATTTGTTTCTGAAAACGATTGGCGACGATTACACTATCAGAACGT  
GCTTGCCGAAGAAGATTATAAAAAGGCCTGTCTCGCTTTACAGGTGGCAGGTTAT  
GCGACAGACCCTCAATATGGGTCAAATGATTACACTTATTGAAACGCACTAG

**GroupB-minor\_tail\_protein**

ATGACTGAAACGTTTGAAGGCTTATACGTCAAATTTGGTGCTAATACTGTTGAAT  
TTGATAGGTCTGTAAAAGGTATCAACACTGCCTTATCTAGTTTGAAAAAAGACTT  
CAATAACATCAACAGACAATTGAAGATGGATCCAGACAATGTTGACTTGTGAA  
TCGTAAGTTGGTTAACTTGCAAGAACAGGCTCGTGTTGGTGCTATGAAAATTGCT  
GAACTCAAAAAGCAACAGAAGGCACTGGGAGAATCTGAAGTTGGGTGAGCACA  
GTGGAATAAGCTTCAACTTGAAATTGCTAAGGTTGAATCACAGATGAAGATTGTT  
GATAAGGCAATGGAGTCAACAAAGAAACACATTGAAGATGTAGGAGACCCAAA  
GTCTATTCTGAATCTTAACAAAGAAGCTTGATAATGTTGCTAAAGAGCTTGATATT  
GTCAATCAAAGCTTGAGCTAGACACTGACAATGTCTGAAGCTAGCAGAGCAAAAA  
ATGAAACTACTTGGTAAACAGTCGGAATTGGTTGGGGATAAAGTCCAAGAATTA  
AAGAAAAACAAGCTGCCCTTGGCGATGAGAAAATAGGTACAGAAGAATGGCG  
TCAACTTCAAATGAAATCGGTCAAGCTGAAGTTGAAGTTCTAAAGATTGACCGT  
GCAATGGACATTCTTGGTGAGTCAAGCCGTTCTGCAACTGGAGACATCAAAGAG  
GCAACCAGCTATTTAAGAGCTGATGTCATGATGGATGTTGCAGATAAAGGCTGGTC  
AGATTGGCCAGAAAATGGTTGGCGCTGGGAAAATGACAGTAGATGCTTGGTCTG  
AGATAGATGAGGCTCTGGACACCGTCACAACCAAAGCTGGTCTGACTGGTGATG  
CCTTAGCAGAGCTTCAGGAAATTGCTAAAGACATTGCTACTGGTATGCCTACCAG  
CTTTCAGAATGCTGGTGATGCCGTTGGGGAATTGAATACTCAGTTCGGTTTGACT  
GGGAAAAGCTGAAATCAGCATCTGAATTACTTATCAAGTATGCTGAGATTAAC  
GAAACAGACATTTCAAGCTCTGCCATTTCTGCAAAAACAAGCTATTGAAGCTTACG  
GTTTGACAGCTGAAGACTTGGGAATGGTCTTAGACAATGTGACCAAAGCCGCTC  
AAGATACAGGACAGTCAGTTGACACGATTGTTCAAAAAGCCATTGACGGTGCTC  
CTCAGATTAAGGTTTGGGACTTTCTTTTGAAGAAGGTGCTGCACTGATCGGTAA  
GTTTGAGAAAAGCGGTGTGGATTCACTGTCTGCTCTATCCTCTCTATCGAAAGCT  
GCTGTCATCTATGCTAAAGACGGTAAGACTCTGACAGATGGATTGAATGAGACT  
GTTAGTGCTATTCAAATTTCTACTAGTGAGACAGAGGCTTTAAGTATTGCCTCAG  
AAATCTTTGGTAGTAAGGCTGCTCCTAGAATGGTCGATGCTATTCAGCGTGGTGC  
TTTTAGCTTCGATGACTTAGCTGAAGCAGCTAAAAGTTCCCTCTGGTACTGTCTCC  
ACCACATTTGATGAGACGCTTGACCCAATAGATAAGTTGACTCAGTATTCTAACC  
AAGCAAAAGAGGGAATGGCAGAAGCTTGGCGGTAAATTGCTTGAGACTGTCATCC  
CAGCTTTAGAACCTTTGATGGGTATGCTTGAATCTTCTGTCAATTGGTTTACTAGC  
CTAAACGAAACTGATCAACAGACTATCGTGATTCTTGGCCTAGTTACAACCTGCTG  
TGATGATGTTGCTTGGTGCAATTGCACCGCTGGTCATCGCCATAGGGGCAATAGG  
TGCGCCTGTGCGAATTGTAGTGGCGGCAATAGTAGGGGCTATTGCCGTCATAACA  
CTTATCATCCAAGCAATCATGAACTGGGGAGCCATAACTGAATGGCTTCAGTCAA  
CGTGGGATTCTTGTGCTGCCTGGCTTTCTGAATTGTGGACTAACATAGTCAAGAC  
TGCCACCACAGCGTGGTCAAATTTCACTGCCTGGCTTTCTGGCCTTTGGTCTTCAG  
TAGTCTCAACTGGACAGTCTTTGTGGTCTAGCTTTACTAGTTCCTTGTCCAATATT  
TTCTCAAGTTTGATTACAGGTGCTCAGTCTCTGTGGTCAAGTTTCACTTCCACTCT  
TTCCAATTTGTGGTCTGGACTGGTCTCAACTGGGTCAAATTTGTTTAATAATTTGA

GTAGCACGATTTTCAGGAATTTTTAATGGGATACTTTCAACAGCAAGCAATATTTG  
GAATTCCATAAAAATCCACTATTTCCAATGCAATAGATGGGGCGAAAAATGCAGT  
GTCCAACGGGGTCAATGCCATCAAGAATCTGTTTAACTTCCAGATTAATGGCCT  
CATATCCACTACCTCACTTCCGTGTGAGTGGTTCTGCTAACCCCTCTGGATTGGCT  
AAAAGGTGGCTTACCAAGTATCGGCATTGACTGGTATGCCAAGGGCGGTATCAT  
GACCAAACCAACCCTATTTGGCATGAATGGAAACCGTGCAATGGTTGGCGGTGA  
GGCTGGCGCTGAAGCCATCTTGCCATTGAATAAGTCAACCCTGGGGGCAATTGGT  
CAAAGTATTGCTAACACGATGAATACATCGAACAAATTAACGTAACTTCTCTG  
GCGTCACTATCAGGGAAGAAGCTGACCTAACAGACTAGCCAACGTGGTTGGAA  
ATCGTATTGCTGAAGAATTGCAACGTAAACTAATTTGAGAGGAGGAATGGCAT  
GA

### **GroupB-hypothetical\_protein**

ATGAAATACACTTATTTAGCATTGTTTGAAGTGGATAAAGAAAACGGTGGCTATA  
ACATTTCTTTCCCTGATTTTCCTGGAGCATTAGTGAAGCTGATAGCTTGAACGAG  
GCCATTTTAAACGCTCGTGAAGTCCTTGAAATCTATACAATTATGTTTGAAGACG  
AGGGCAAAGAGTTTCTAAAGCATCATCATTCAAGGCTCTTGCAAGCAATTTAGC  
AAGTGACGAAGATGTGATTCAGGCTATTTCAAGTTGATACTGAGCTTGTCCGTGAG  
CGTGAACGCTCTAAGATTGTCAACAAGACTGTCACACTGCCAAGCTGGCTTGTGG  
AAGTTGGAAAAGAAAACAAGGTCAACTTTAGCCAGCTGTTGCAAAAAGCAATCC  
GTGAGGAATTGCAAGTATAA

### **GroupC-repA**

ATGGCAGAGAATGATTTTAATTTGCTACCGTTGCTGGATTATATCAATCCTGCCA  
CGGTAGACTATCAAACATGGGTTCAAGTAGGAATGGCCCTAAAGCATGAAGGTT  
ATACAGCAATGGATTGGGATGTTTGGTCACAATCTGATAGTAGATATAAAAAAG  
GTGAGTGTTTTGCAAATGGGATAGTTTCCAAGGCAATGGCTTTGGGACTATCAC  
AGGGGCAACAATCACACAGCTAGCTAAAGATAATGGATGGACATCATCAGAGTA  
TCGTAACAGCGATGATGCTCATGAACTCAGCTGGGACGATACAATCGATCGTGA  
TTATAAGATTGTCGATAAAAATTGGATTGAATCGAAAGAGATTCAAGAGCCAAG  
AAACTGGAATCCAGTTCAAGATTTAATTACTTACATAGATACCTTATTTGAATCA  
ACTGACAAAGTTGGTTATGTAACAGAGACCTATCCAATTACCCTTGATACGGGAG  
AGATTGTTTATAAACCAACAAAAGGAGCGTATGACAGGACTGCTGGTCAACTGA  
TTGAATCACTCCAAAAAATCCTACTGACTTAGGAGCAGTATTTGGAGACTTCAA  
AGAAGAGGCTGGTGCATGGATTTCGTTTTAATCCACTAGATGGAAATGGTGTCAA  
GAATGACAATGTAACAGACTTTAGATATGCCTTGGTTGAATCCGACAGCATGGA  
ACTTGGTAAACAGTATGCTTTGTTTAAAGAAGACTAGAATTGCCAATAGCAACCTTA  
GTCCATAGCGGTAAAAAATCATTACACGCTATTGTCAAAGTAGATGCTCGTGATT  
ATCAGGAGTACCGCAAACGGGTTGATTATATCTATCAAATTTGTAAAAAGAATG  
GACTTGATATTGACACACAGAACCGCAACCCTAGTCGATTATCACGCATGCCTGG  
TGTGACTCGGAATGGGCACAAGCAATTCCTGATTGATACTAATGTGGGTAAAACC  
AACTACGAAGAATGGTATCAATGGATTGAAGATTTAAATGACGATTTGCCTGACC  
CAGAGACGCTAGCTGACGAATGGGATAATATGCCAGAATTGGCACCGGAACTCA  
TCAAAGGAGTTTTGCGTCAAGGCCACAAGATGTTGATTGCTGGACCATCAAAAG  
CTGGTAAGTCGTTTGCATTAATTGAGCTATCCATCGCGCTGGCTGAAGGTAAAGA  
ATGGTTAGGCTGGCAGTGTGAACAAGGTAAGGTCTTGTATGTCAATCTGGAAGTG  
GATAGACCGTCAGCTTTGCATCGCTTCCGTGATGTATACGAAGCTATGAGCTTGC  
CACCAGCAAACATCAAGAATATTGATATTTGGAACCTACGTGGAAAGACCGTTC  
CCATGGACAAGTTAGCGCCTAAGCTTATCCGTGCTAGCTTAAAGAAAAATTACCA  
AGCGGTCATCATTGACCCTATCTATAAGGTGCTGACTGGTGTGATAAATAGTGCG  
GACCAAATGGCTCACTTTACCAATCAGTTTGACAAAGTAGCTACTGAGTTAGGTT  
GTAGTGTGATTTACTGCCACCATCACTCAAAGGGGAGCCAAGGCGGTAAAAAAT  
CTATGGACCGTGCAAGTGGTTCAGGAGTGTGTTGCCCGTGACCCTGATGCACTGAT  
TGACCTAGTAGAGCTAGAATTGACTGAGGAACTCATCAAGTCACGCTCAGAAAA

AGCAGCCGCTAAGATTTACCAACAAGCCTTGCAAGAAAAAGCGCTAGCCTACTA  
TCAACAGGAAGTAACGCTAGATGATTTGGAAAGTCGTTATCAGATGCAGCAACA  
TTTTGACAAGGCTATCAAGGACATCATGATTAACAGCCCTATCTGGAAGCGGTC  
AAGAAAGCCCAGTATGAGGTGGAGATTTCCACTGCCTGGCGAGTTGAAGGGACT  
TTACGCGAGTTTGCTAAATTCCAACCAGTTAACATGTGGTTTAGCTATCCAGTGC  
ATGATGTAGACACAACGGGTGTCTTGGCTGATATATCACTAGAAGATAATGTGCC  
GACTTGGAAGAAGAATTTTGAGAAGAAGAGTCCAAGAGAGTCCAGGGAAAAGA  
AATCTCAAAAAGTAGAGACTGCAATTAATTCATTGAATGATGGAATAGAGCCAG  
TCACAATCGATAACTTAATCGAATATTTTTCTACTGAAGATAAGCCAGTTTCTGA  
AAAAACTATTCGTAGATGGATAAAAGAAAACGGTAAATTTGAAGTTAAAAATAA  
ACAAATTTTACCAATAGAAGAACCTAAAACCAATAAAAAGTTTGTGA

#### **GroupC-terminase\_large\_subunit**

ATGACGACTAAGACATGCCCTAAGATAAATATTGTTATCAATCACCCAAGCCGAGTTTTTAATCGTCA  
CATCTATGACAATCTATAACTACGATAACTTTACCGAAGTACACTACGGCGGTGCGTCAAGTGGT  
AAGTCTCATGGTGTTCCTAAAAGATAATCTTAAAAGCACTTAATCCTAAATTTAAACATCCTAGAAA  
GATATTAGTCCTTAGAAAAGTTGGTGCAACAGTGAGAGATTCTGTCTTCGCTGATATCATGTCTAACCC  
TGTCGATTTTTGGCATATTATACAAATGTAAGGTAATATGTCAGCGTTTGAATAACGCTTCCTAAC  
GGCTCAGAATTCATATTTAAAGGTATGGATAACCCAGAAAAGATTAAATCAATTAAGGGTATATCCG  
ATGTTGTCATGGAAGAAGCTAGTGAGTTTACTCTTGACGATTACACACAGCTTACCTTACGTCTTAGG  
GACAAGAAACATTTAGAGAAACAAATCTATCTTATGTTTAAACCCTGTGAGTAAAGCAAATTGGGTTT  
ATAATGCTTTCTTTGTAAAGTCTCCAAAGAACACAGTCGTCTATCAAACGACTTACAAAGATAATAGA  
TTTCTTGATGAAGTTACTAGAGAAAATATCGAGGAGCTAGCCAATAGGAATGAAGCCTATTATAAGA  
TCTATGCGCTTGGGCAGTTTGCTACACTTGATAAACTAATTTTTCCCAAATATGACAAGCAAATATTA  
AACAAAGACAAGTTATCACACTTGCCTTCTTTTTTGGTTTGGACTATGGGTTTATCAATGACCCTTCG  
GCATTTTTGCATGTTAAAATCGATGACACAAACAAGAAGTTATACATCTTAGAGGAATATGTCAGAA  
AAAATTTGACAAATGACAAAATAGCAAATGCTATAAAGGACCTTGGCTATGCCAAAGAAGAAATCA  
GAGGAGATTCGGCTGAAAAGAAATCTAACCAAGAGCTGAGGAATTTAGGTATTCCTAGAATGATTG  
ATGTTGCCAAAGGGCCTGGAACCGTTATGCAAGGAATTCAGTACCTGCTTCAGTATGATTGGATTGT  
TGATGAAAGGTGTGTCAAGACTATTGAAGAACTAGAAAATTACACTTGGAAAGAAAGACAAGAAGAC  
TAATGAGTATATCAATAAACCAGTTGACAGTTACAACCACTGCATTGACGCCATAAGATATGCCGTA  
CAAGACAGAATATACCAGTCGGCAGATAGAAGTAAGCGCATGAAGAACGCGAAGTACTATTTTTAG

#### **GroupD-terminase\_small\_subunit**

ATGGGGAGAAAATTTAAAAGTAGTTGAAACGACAAAAAACACCTTACTAAAGA  
AGAGAAAAAAGTTTCGAGAAACCGCTCAAGAAAAGGCTTCTGACGGTCTTGCGAA  
ATTGCAAGTAACGCCACCGCGGCACTTAAACGAAGTGGCTAGAGCTGAGTATAG  
AAGAATTATAAATGACCTGCAGACCCTACCCACAAGAACTTAGATAGAGGGCT  
ATTAGAGTTATATTGCACATGGTATGCTATCTACAAAGAAACAAGTAGAAAATTA  
GATGAAGTTGGCTATTTTGCGAATGATCCAGACAAAGGTTTAATTCAGAGTCCGC  
TTATTTTAACTGGAAGGCTACAATAATATCAGAAGTAGTGCTAGCCAATT  
AGGTTTAAACAGTTGACAGTCGTATGAAGATGTTTATTCCTAAGGAAGAAGAGAA  
ACAAAAAAGTATTTTTGATAAATTTGGAGGGTAA

#### **GroupD-terminase\_large\_subunit**

ATGACAATAGAATACGATTATTCAGCAATTAGCGACATTTATAAAGATGACACTT  
TTTATTATGCAAAAAAGATTGTTGATGAAGAGATTAAAGCAAGCAAGAAAGTGT  
TTAAGGCTTGTTAAGACATTTGAATGACCTCAAACGTATAGAAGATGAAGATTT  
TAAATTCATCTACTTGCCACAAAAAGCATCTGATCCAATTAATTTTCATTGAGATTT  
TACCAGACGTCAAAACAGGAAAACCTTATCCATTAGCAATGTTCCAAAAATTTAT  
TATTGGGAATTTATATGGATGGCGGAAGAAAACAGACCATTCCTTAAGACGTTTT  
AGAAAAGCTATGATTTCTGTTGCTCGTAAAAATGGTAAAACCATTCCTTATAGCTG  
GTATATTGCTTTATGAATTTTTGTTTGGTCACAATCCGTCTATGAGTAGGCAATTG



TTTTGTACAGCGAACGACCGCACGCAAGCTAAAATAGCTTGGGATATGGCAAAA  
AAGCAGTTAGCTTCCTTAAGAGCAAAGGATGCCGATGTCAGAAAAGCTACAAAG  
ATTGTCCGTGATGAACTAAAAAACTTACATGATGAATCTTATATAAGGGCGCTTA  
GTCGTGATACTGGCGCAGTTGATGGATTTGAACCGTACGTTGGAGTGTGGATGA  
GTTTCGCAGCGTCAAAGACAAACGAAATGTTAGAACTATTGGAATCTGGTCAAGG  
ACAGTTGGATAATCCGTTTATCTTAATCATTTC AACGGCTGGTATGGATTTGAAT  
GTTCCGATGCACACAATTGAGTATCCATACACTAAAATACTAGACGGAGAA  
ATCACAGACGAGGGCTATTTTGGCTATGTCGCAGAGCAAGACAACGAGGAGGAA  
ATTAAAGATGAAACGAATTGGATAAAATCTAATCCAATTCTCGAAGTCGATACTC  
TACATGATAAGTTGATGGACTATCTAAGAACTCGTCGTAAGGTATCTCTAGAGAC  
TGGAGAAGTCAACAAAGTGTGATCAAAAACCTTCAATATGTGGCGTCAATCCAG  
CGAAGAATCATATATAGATAAACAGTCGTGGGAGCTTGCTAAGATTGATAAGCC  
AGACACATAACAAGCGTAGGGTTTGGCTAGGTGTTGACGTTGGGCGTGTAAAGTGA  
CTTGTTTGGCATTAGTCCTGTTGTTATGATGGATGATTATTGGTATGTTGATAGTT  
TTTCATTTGTAGCTACAAAGTATGGCTTAACTGCCAAAGAAAAGCGAGATGGTGT  
ATCTTATAGCAATCTAGAACGTCAAGGATATTGCGAAATAACAACCCTTGAGAG  
CGGGGTTATAGATGATGAACGGGTTTTGGAAAAAATAGAGGAGTTAATCTATAT  
AAACGAATGGGAAGTACATGGGATTTGCTTTGACCCATACCAATTCGGAACACT  
ACTTACAATGATTGAAAAAAGACATCCGGAATGGCCTCTAATAGAAGTTTCGCA  
AACGACAATGGTGTAAACATGCCGACAAAACAATTTTCGTGACGACCTTAAAAA  
AGGCAAAATAAAGCATTCTGGCAATCCACTATTGACCATGGCTGCTAACAACGC  
TTATATTAACCGATAACAATGGCATGAGGATTGACAAGAACAAGAATAGCAA  
CAAGATTGACCCGCTAGACGCAGTTCTTGACGGTTATGCTGTATGTTACCTAGAA  
CCATTTGACGGTTCTGGCTACTGGACAAGCGAGAAAATTTTAGGAGGAGAGACG  
CTATTTTGA

#### **GroupD-phage\_major\_tail\_protein**

ATGCAAGCAGTAGGATTTAAACGAATGACTATCCAGTTATTATCTGAAAAAAAAA  
GACAAAATTGTTATCGAAGGTGCATCAGGAAAAGGTGCTACAAAACAGCTAAG  
ATTAGTGGATTATCAGCAGCTCCTGTCAAACTTACGGTTCTGATATCGCTTATTA  
CACTTCTCGTCGAGGTGTTGGCGATGTAAAAATGGAGATGGAAGCAATTGATATC  
CCATTTGACTCGCTTAAAAAAGTATTGGGATATAAAACAGGAACCACCTCAACA  
GGTGTTCCTTTTATTGGAGAAGATACAGAAGCTCCAGAAGTATCAGTCTTACTTG  
AAGCACCTGGAAGTGAAGGAAGCGTTTATCTAGGCTTCTTCAAAGGAACCTTCTC  
GATGGAAGATTTTCGAATTA AAAACACAGGAAGAAAAACAGGATGGTTTAGACTC  
TCAAAAATTAGTATTCACAGCACACCAGGAGATACTGGAGAAGCGAAAGGTCA  
ATATGTCGGCTGGGCAATAGATAAAGAAGCAGAAGCTAAGGGCGAAAATGCAA  
AAGCGTTGGTTAACTTTTGAATCAAGACGCACCAGGAGTGTA

#### **GroupE1-tail\_protein\_2**

ATGGTCACAAGTTCACCGATTTATGGGAAAGATAAATTTTTGATGTTCCGTGTGC  
TTGGAGATAAGGCAGCTGCGGCTAAATTGTCTTTTCAGACAGAACATAAATGGA  
AATATAGTAGAAAAACAGATGCTAAAATCACAAAAGATGGTGCTATCAATTCTG  
ACAAAGGGCTTGAGGTAACCTTTGGAAATCAAAGGCGTGGCAAGTCGTGATGAAT  
TGAATACGACACTAAAGAATGCTGTTTTAGAAAGTAAACAAATTGAAGTTTGGG  
ATATTGACTTGAATAGCAATAACGATTCAGACGGGAAATATGATGCAGAATATG  
CTATTGGGCGATTGGGATCTTGGGAAGTCCCTTCCAATGTTGAGGAATTTCTGA  
AATTTCCACAGAAATGGCTATCGATGGCAAACCAGTTAAAGGTAAAGCCACTCT  
TACAAAAGAACAGATTAAGCTATTCAATATGTATTTAAAGATGTAACAAAAT  
TGATGAATCTTCCGTTTCTAGTCCGGGTTCTGTTTCATAGCAGATAA

### **GroupE1-capsid\_protein\_E**

ATGGCATTAAATTTATGACGTTGTAACATCTGCTAACATCAAAGGATTTTATGATA  
AACAAACAAGCAAATGTTGACTTGACTTTGGGAGAAAAAGCTTTTCCATCTAAAC  
AACAACTTGGTCTTAAGTTATCATTTATCAAAGGAGCAGCTGGTAAACCAGTTAG  
TATCAAAGCGGCAGCGTTTGACACTAAAGTTCCACTTCGTGACCGCATTGCTGTA  
GTCTTATTAGACGAAGAAATGCCTTACTTTAAAGAAGGTATGCTTGTA AAAAGAGG  
CTGACCGTCAACAACCTTAACGTTTTAGCGCAAACCTAAAAATCAAGA ACTTATTGA  
CACAGTGTTATCAACAATCTTTAACGATGAACTACTCTAATCGCTGGTGCTAAA  
GCACGTCTTGAAGCTATGCGTATGGAAGTGTGTCAAGTGGTAAAATCCACATCA  
ATTCAAATGGTGTATGAAAGATATTGATTATGGATTA ACTGGA ACTCAAACGAC  
TAAGAGTGAACAAAAATGGTCAGAAAAAGACACCGCTAACCTCTTGCTGATAT  
CGAGAAAGCTATTGAAACAGTAACAGAGCGAGGTCACGTTCTTGAAGCCATCGT  
CTTAAACTCAAAAACCTTTTGGCTATATCAAAAACGCAAAAGCAACCGTAAAAGC  
AATTA AACCACTTGCACCGGAAGGCTCAATTGTTACTAAAGCAGAATTA AAATCT  
TATCTTTCTGAAGAATTGGGATTAATATCTTACTTAAAGATGGTGTGTTTGTAA  
TGACGCAGGTGAAAGCAAGAAGTATTTCCCTGATGGCGTAGTTACACTTGTACCT  
AATGAAATCTTGGCTATACAGTATTCGGGACA ACTCCAGAGCAGTCTGACCTTA  
TGGGTGGCCAAGCAACTGATGCACAGGTATCTCTTGTAGAGACAGGTATTGCTGT  
TACA ACTACTAAGACTACTGATCCTGTTAACGTACAGACTAAGGTTTCTATGATT  
GCTCTACCATCATTCGAGCGCTTAGATGAAGTACAGATTGTAACAAGTTCGGAAG  
TATCATTATAA

### **GroupE2-phage\_major\_tail\_protein**

ATGGTAGCAAATTCATCAAACGTTACTACGGCTAAACCTAAAATTGGTGGTGCTA  
TTTATACTGCGCCGCTAGGAACAGAATTACCCAAAGACACAGCATCAGAGTTAA  
ATGAAGCCTTTAAGTCATTAGGGTACATTTCCGAAGACGGCTTATCAAACGAAG  
ATAAACGAGAATCAGAAGAGATCCAAGCGTGGGGTGGCGATGTTGTAGAATCTG  
CACAAAAAGTAAAGCAGATAAATTTACATATACATTGATTGAAGCATTGAATA  
TTGAAGTACTCAAAGAAATCTATGGCAAAGATAATGTA ACTGGAGACCTTAAAG  
CCGGGATTACTGT TAAATCAAATTCAAAACCACTAGAGGAACATTGTTTGGTTAT  
CGAGATGATTTTGAAAAACAATACAGTTAAACGTATTGTAATACCAA AAGGGAA  
AGTATCCGAAGTTGGTGA AATTAAGTATGTCGATAACGAAGCGGCTGGTTATGA  
GACAACGTTACAAGCGTTTCCTGATGCAGAAGGAAACACTCACTATGAATATAT  
AAAAGGAGCTGGTTAA

### **GroupE2-phage\_protein**

ATGAGATTTGTTAATTTTGACTTAGTAACCCACAAAAACGGGAGAAAAAGAC  
AGACTCGGCAACGACATCACGAAAGATGTTGTCAA AAGAGTTGCTAAAGGTCGT  
TTACTGAATGGTCGGCTGATGACGTGTCCTTATACGGTCGAGATTTAACGTCTA  
GCGCACGCAAATTGCTGACTAATCAAGTTAGCAAGGCGGAAGCCAAACAAGCGT  
CACACGTTGTAATAGACGGCTCGAAATACAAAGTAGAATCCGTTAAAGACCTTG  
GTAGATGGAGACTACTCGTCATTAAAGGGTATCGCTTATGA

### **GroupF1-structural\_protein\_GP20**

ATGAGCCTTAAACGTGAGATGTTGGTTGCCGCAGGTATCACAGATAACAGTGTG  
CTGGATAATATCATGCAAGCGTACGGTGCAGGTATTGAAAACGCAA AAGCACAG  
GCTAAGTCAGAGTTACAGGCAGAAAACGACACCTTGAAACAACAGCTTGGGCAA  
CAAAACCAAGCTATCAAGGATTTACAGGAAAAAGAGGGAGCAAGCGAGGAAAG  
CAAGCAACA ACTGGCAGACCTACAAGCCCAATTTGACCAGTACAAGACTGATAG  
TGAGGCACAGCTTGCTCAGGTTACTAAA ACTAACGCTGTAGCCCTTGCCTTGAAA  
GATGTGGGAGCTTACA ACTCTGAGGACTTGATGAAGTTTATTGACCTAGACAAGA  
TTGAACTAGGCGAAGACGGAAAACCTCTCTTAGAGGACACAATCAACAGCCTCA  
AGGAAACTAGCCCTTACTTATTCCAAGGCGAAGATAAGCAGCCTAACCCCTAACA

TCTCTGTACCAGGTAACCCAGCGGCTGACAATGGGGACAACCTTGAGTGCAGAGG  
ACAAAGCCCTTTTTGCCGGCTTTGACAGCGTATAA

### **GroupF1-terminase\_large\_subunit**

ATGGCGATACTGAACCTAGCAAAGCTGATTAACCCAGTATTTGATGAAGTGCTCT  
ATACGCTCAAGAGTCATATAGTGCTAAAGGGTGGCCGTGCCTCTACTAAGTCCTC  
TGTGGTGTCTATTGACCTAGTAAACGACTTTATCAGTGACCCTCTGGGTAATGTG  
GTAGTCCTACGGAAAGTGGGGAAGTATCTTAGAATGTCTGTCTACGAGCAGATA  
AGATGGGCGATTTATGAGATGGGGCTAGCCAATCAGTTCAAGTTTGGTAAGTCAC  
CGCTACAAATCACTCACAAAAAGACAGGAACAGCTTTCTACTTCTACGGCGTAG  
ATGACCCAATGAAACTCAAATCACAGAAGATAGCCAAAGGGTATGTCATGTCTG  
TATGGTTTGAGGAACTTGCAGAGTTTGCAGGTCGTGAGGACATTGATATAGTTGA  
GGATACCTTTATCCGTCAAGAGTTGCCAAATGGCAAACAGGTCAAGGTTTATTTT  
ACATACAACCCGCCTAGAAACCCCTATGACTGGATAAATGGCTGGGTGGCTGAG  
AAAGCTAGTGACCCAACGTATTTAATACATCACAGCACCTACCTTGATGATAAGT  
TAGGCTTTTTGTCTAGGCAGATGAAAGAGAAGATAGAGCGGTACAAGGAGACTG  
ACCCTGACTACTATCGCTGGATGTACCTAGGAGAAGTTATAGGTCTTGTAATCA  
TGTTTATAACATGAACTATTTTAAACCACTTGAGAGCCTCCCTAATGATGACAAG  
GTGATAGGTATATCATTGCTTTAGATACTGGACACCAGCAATCGGCTACAGCCT  
GTGGAGCTTATGGATTGACTGCCAAGGGTAATGTTATCTTGCTTGATACTTTCTAC  
TATTCACCAGCTGGCAAGACGATTA AAAAGGCACCCAGTGAGCTCTCAGTAATG  
ATACATGACTTTATTGATAAGGTCATGAAGACTTACAGAGTGCCAAAGCTCAAG  
ATGACTATTGATAGTGCTGAGGGTGCTTTGAGAAATCAATACTTTAAGGACTATG  
GCGAACGCTGGCACCCAGTAGCCAAAAAGAAAAATCAGACCATGATTGACATGG  
TTATCAGCTTACTAGCTGAGGGACGCTTTTACTACCTTGACATTCCTGCTAACAA  
GGTCTTTGTTGAGGAGCATAAGATGTACCGCTATGATGACAAATCTCTTAACTCT  
GATGACCCCAAAGTTATCAAAGAAGATGACCATACGGTGGATGAGTTCAAGTAT  
TTTGTCTGGACAACGCTAGGGAGCTAGATTTGAAAGCCTAA

### **GroupF2-phage\_capsid\_and\_scaffold**

ATGTCATTTACAACACAGGCTTTACTTGATTTAGGGTTAACTGATGAGCAAGCAA  
AAGAAGTATTTGCTTTGCGAGGTGCTGAGATTAAAGATAATCAAAGCGCACTTG  
ATACATTA ACTGCTGAACGGGATAGCCTAAAAACACAGTTGGAACATAATCAAG  
CAGAAATGAAGAAGTTACAAGACGATGTTGAACTTAGCAAAGACTCAAAGATG  
CACTTGCTAAATTACAGTCAGAGTTTGATGATTTCAAAAAAACTGCTGATGAAAC  
GTTGCAACAAACAATCAAGACAGATGCAATTAAGCTTGCAATTAAGATACAAA  
TGCACTTGATACAGATTTGATGATGAAATTGATTGATGTTGACTGTTGAATTA  
GATGACAATGGCAAACCTCAATTAGAAACAATTATCAATGAGTTGCAAGGAAGC  
AAACCATTTTTATTGCAACCAGCTCAAGAACCATCTGAACAAGGTAATAGCAAAC  
CAACTATCTTTAACAATGGCAACCCACCAGCAAACCCTGCTAAGACAGAGGTTG  
ACCCGTTTGAGGCGGTTGTTAATAGCTATTTATAG

### **GroupF2-terminase\_large\_subunit**

ATGCAAATAGTTAATATCCAAAAGAATATTAACCCTCACTTTAAAAGTGTTTGGT  
TATCTAAAAGCCTAACAAACATCTTGCGAGGTGGTCGGAACCTTTCAAATCGTC  
TGTTATCACTCTAAA ACTAATTTACATGATGATTAAGTACATCATTAGAGGTGAG  
AGAGCTAACATAGTTGTCATTCGTAAGGTTGCTAACACATTAAGGGATAGTGTTT  
ATAATCAAATACAATGGGGATTAAGGTTGTTTTGTATTATTGGCATGTTCAAAT  
GACAGTTAGTCCATTCAAGATAACTCATATCAAGACAGGATCAACATTTTTATTTT  
TATGGATTAGATGATTTCCAAAACTGAAATCAAATAACATTGGTGATCTTATTG  
CGGTATGGTATGAGGAGGCTGCTGAGTTTTCAAGTTATGAAGAATTTGACCAAAC  
TAATATCACATTTATGCGTCAAAGCATCCAAAAGCTGACTTTGTTCAATTCCTTTT  
GGTCATATAATCCACCTCGTAATCCTTACAATTGGATAAATGAGTGGTTTGAACA

ATGCAAGCAACATCCTGATTATCTATGTCACTCTAGCACTTATCTTGATGATGAG  
TTGGGATTTGTTACACCGCAAATGTTAGCCGACATTGAACGTATTAAGAGAATG  
ATTATGACTATTACAGATATGTCTATCTTGGTGAGGCAGTCGGGTTAGGTAACAA  
TGTATATAACATGAGTACCTTTCACGCGCTGGATGCATTGCCATCTGATGATAAG  
CTTATTGGCATACTTATGCACTCGATGGTGGACATCAGCAATCAGCAACCGCGG  
TCTGTGCATTTGGTATCACGGCCAAAGGTAAAGTTATCTTGCTAGACACATGGTA  
TTATTCACCAGCTGGCCAAGTGGTTAAGAAAGCACCAAGTCAGTTGACTCAAGA  
GATTAATGCATTTATGCAGGGCATAACAGATAAGTACAAGGTGCAGACTTTACA  
ATACACTATCGATAGTGCAGAGGGTGCTTTGCGAAATCAATTTTATTTGGACTTT  
GCTATCAGATGGCATCCGGTGGCCAAGCTTAGAAAAGTAACCATGATTGACAAT  
GCACAGTCGTTACTTGCTCAAGGTAGATTTTACTATCTTGATACAGAAAACAATA  
AAGTATTTATTTTCAGAGCATCGAATGTACAGGTGGGATGAAAAGACAATACACT  
CAGACAATCCAAACGTTATCAAAGAAGATGATCATAACATGCGATGTCTTTCAATA  
TTTTGTTTTGGATAACTCAAGACTTTTGGGTCTTAGGGTTGGGAATAGTTAG

**Data S2.** Prophage-integrase database for the screening and classification of prophages by integrase type. The integrase sequences shown belong to the integrases identified in this study (*GBSInt6.3* and *GBSInt8.2*), the sequences of the integrases identified by Crestani et al ([Crestani et al., 2020](#)) can be found at [https://github.com/chcrestani/GBS\\_prophage\\_integrase\\_typing](https://github.com/chcrestani/GBS_prophage_integrase_typing).

### ***GBSInt6.3***

MRIESYKKKNGTTAYRFRVYIGVIDGKKKYIKRSGFTSKKLAQALINLQQEIENPKD  
KSTLLFKDLTKIWLDNYEKT VQGSTYLKTKRNIENHILPSLGSYQIKDLTPLIIQKYAD  
EWSTKLKYSSKIVGIVRNILNHA VKFYITSNPSAPVSAPKIQRTINKKKDYYNKDEL  
KEFMQLVYNTDDINIIATFRLLAFTGLRKGEMLALTWKDYRNGTLDV NKAITRDIAG  
EHIGPTKNKSSDR LISLDPETMNVLDNLHKTYPKTKYILESASGRWISPTQPRRWLVQ  
ILRDSISKLEPIRIHGFRHTHASLLFESGLTLKQVQHRLGHEDLKTTMNTYVHITETAK  
DEIGTKFSKYIDF

### ***GBSInt8.2***

MWHEEQSNGKIKFIEYYKDPYTGKRKRAYVTLD RYTKQSENKARRMLNEIIDERIKS  
SGDVYIRFGQLVDEWKL SHSKTVKARTMRVYKHPLEQIRAFIGDEVLVKNIDTRLLQ  
KFVDGLKDKYADNTVNLIKQPLNMILDYAVRMDYIQINPMKNVITPKRKKITKKQLE  
EKYLETEQNQKIIAELRDPVYGNHIANFAEVIFLTGMRPGELLALRWDHVDIDNLKIK  
IEYTLDYSTNGHAKADIGTVKNDGSYRTIDMPLRVKEILIEEYNYQSLNDLKNDFIFIS  
KNGNHL SINTINRRIKKT SKKLYGIVITSHSFRHGHITLLAELGIPLKSIMDRVGH TDV  
NTTIKVYTHATDKIGKQ MIDKINKFVPIQSL
